# Supplementary material for: Improved oxygen evolution activity of IrO2 by in situ engineering of an ultra-small Ir sphere shell utilizing a pulsed laser
Source: Royal Society of Chemistry journal article supplement (doi:10.1039/c8nr10163a), 2019-01-01
Supplement: c8nr10163a1.pdf [file c8nr10163a1.pdf]

## Electronic Supplementary Information

### **Improved Oxygen Evolution Activity of IrO<sub>2</sub> by *in situ* Engineering of Ultra-Small Ir Sphere Shell Utilizing Pulse Laser**

*Wenwu Zhong, Zhiping Lin,\* Shangshen Feng, Da Wang, Shijie Shen, Qinghua Zhang, Lin Gu, Zongpeng Wang\* and Baizeng Fang\**

Prof. W. W. Zhong, Dr. Z. P. Lin, Prof. S. S. Feng, Dr. S. J. Shen, Dr. Z. P. Wang  
Department of Chemistry and Material Engineering  
School of Advanced Study  
Taizhou University  
Taizhou, Zhejiang, 318000, P. R. China  
E-mail: [zplin@tzc.edu.cn](mailto:zplin@tzc.edu.cn) (Z. Lin); [wangzp@tzc.edu.cn](mailto:wangzp@tzc.edu.cn) (Z. Wang)

Dr. D. Wang, Prof. Q. H. Zhang, Prof. L. Gu  
Institution of Physics  
Chinese Academy of Science  
Beijing, 100190, China

Dr. Baizeng Fang  
Department of Chemical & Biological Engineering  
The University of British Columbia  
2360 East Mall, Vancouver, B.C., V6T 1Z3, Canada  
E-mail: [bfang@chbe.ubc.ca](mailto:bfang@chbe.ubc.ca)

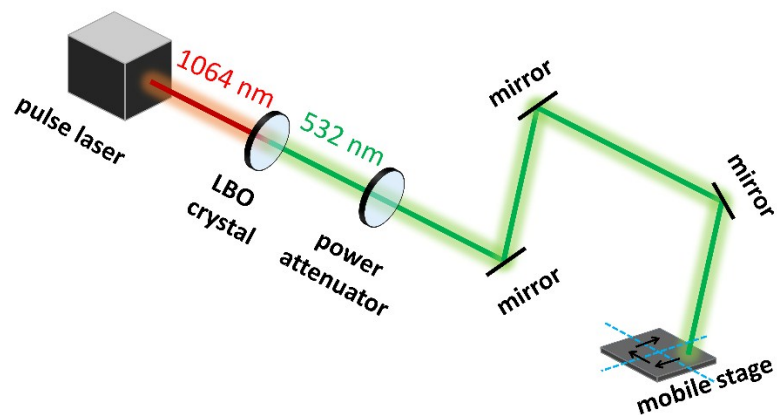

**Figure S1.** Illustration of the experimental setup. A LBO crystal is used to double the frequency illuminated from the laser in order to make the light line visible.

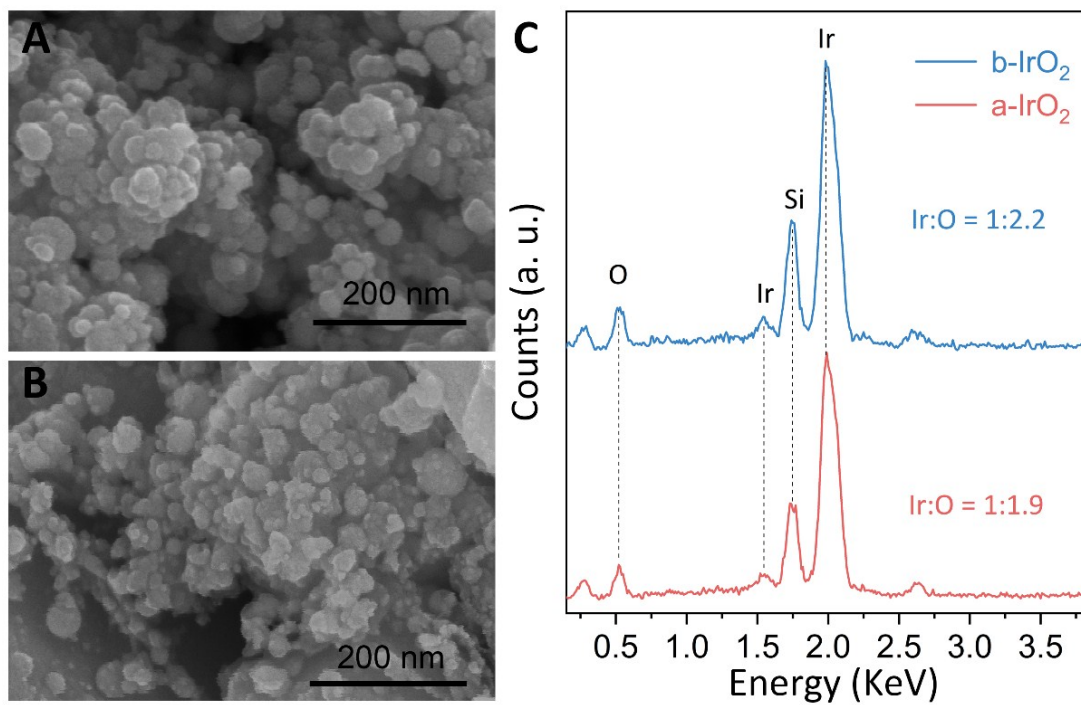

**Figure S2.** A, B) SEM images of the b-IrO<sub>2</sub> and a-IrO<sub>2</sub>, respectively, and C) EDX analyses of the b-IrO<sub>2</sub> and a-IrO<sub>2</sub>. The ratios shown in Figure S2C are atomic ratios.

**Table S1.** EDX elemental analysis for the IrO<sub>2</sub> before and after the laser modification.

| Element | Atomic Ratio (%)   |                    |
|---------|--------------------|--------------------|
|         | b-IrO <sub>2</sub> | a-IrO <sub>2</sub> |
| O       | 54.93              | 52.83              |
| Si      | 20.15              | 19.08              |
| Ir      | 24.92              | 28.09              |

**Table S2.** ICP analysis for the IrO<sub>2</sub> samples before and after the laser modification.

| Element | Normalized content of Ir (%) |                    |
|---------|------------------------------|--------------------|
|         | b-IrO <sub>2</sub>           | a-IrO <sub>2</sub> |
| Ir      | 100                          | 123                |

Notes: The content of Ir in the a-IrO<sub>2</sub> was normalized by the content of Ir in the b-IrO<sub>2</sub>.

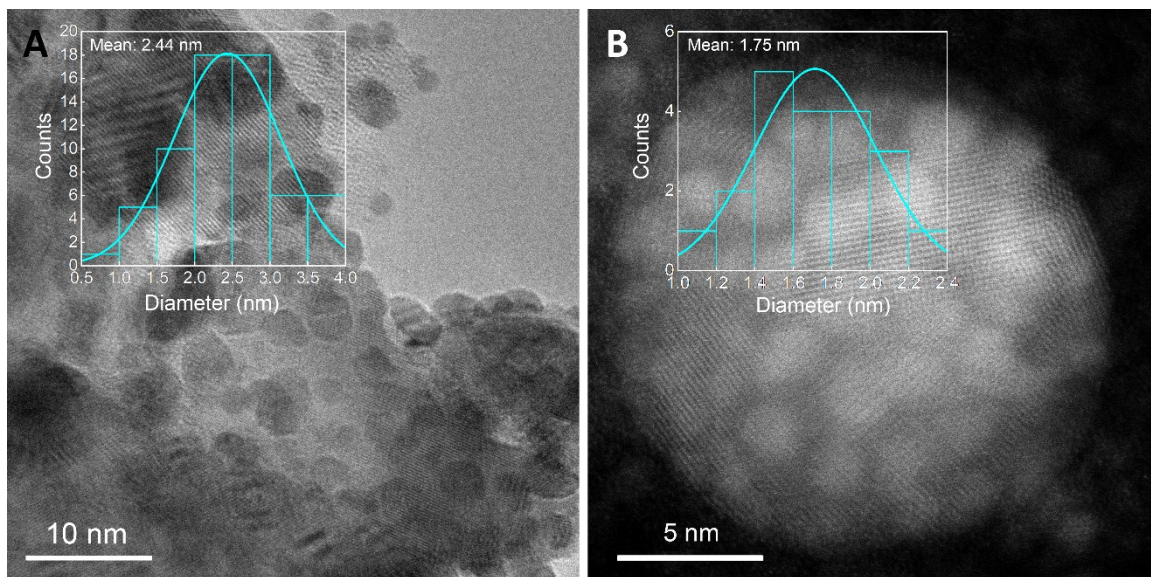

**Figure S3.** A) TEM image of the a-IrO<sub>2</sub>, and B) HRTEM image of the a-IrO<sub>2</sub>: Small Ir spheres (ca. 2 nm) are distributed on the surface of an IrO<sub>2</sub> sphere with a large size (over 20 nm). The insets in A and B are the statistics for the Ir sphere diameter.

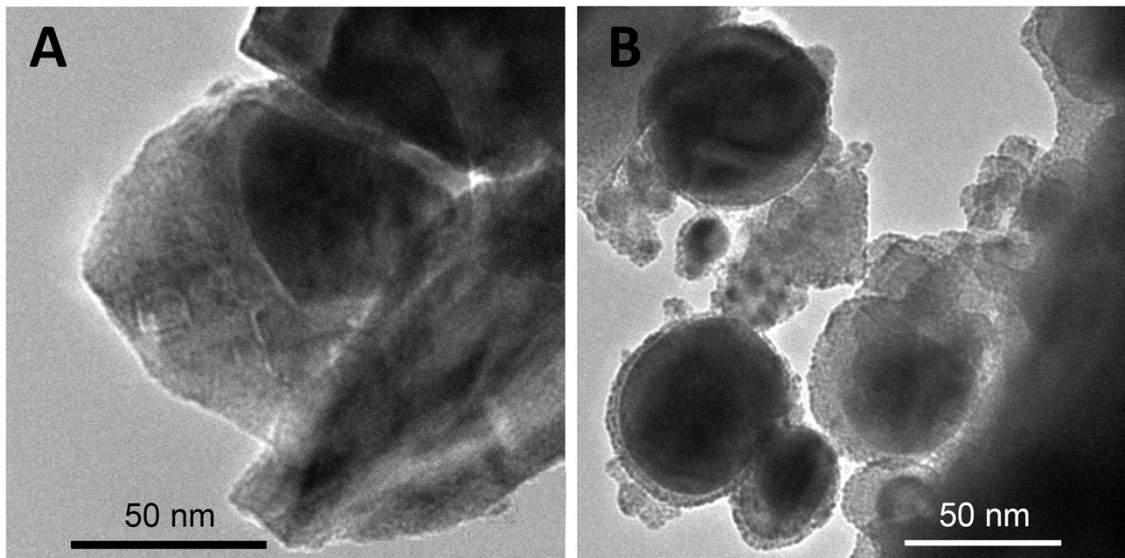

**Figure S4.** A) and B) TEM images of the b-IrO<sub>2</sub> and a-IrO<sub>2</sub>, respectively.

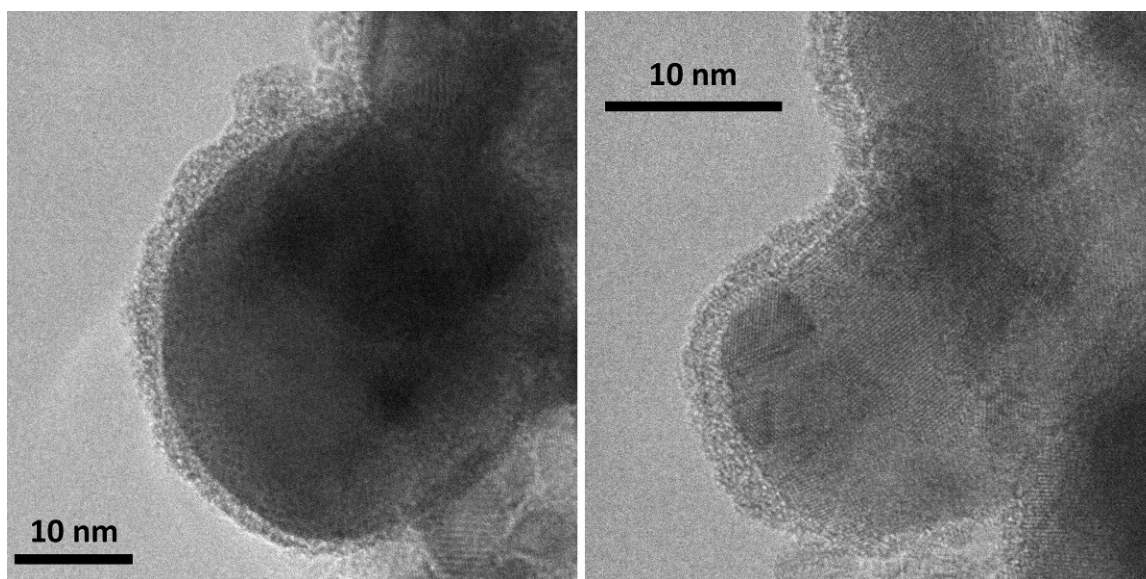

**Figure S5.** HRTEM images of the a-IrO<sub>2</sub>.

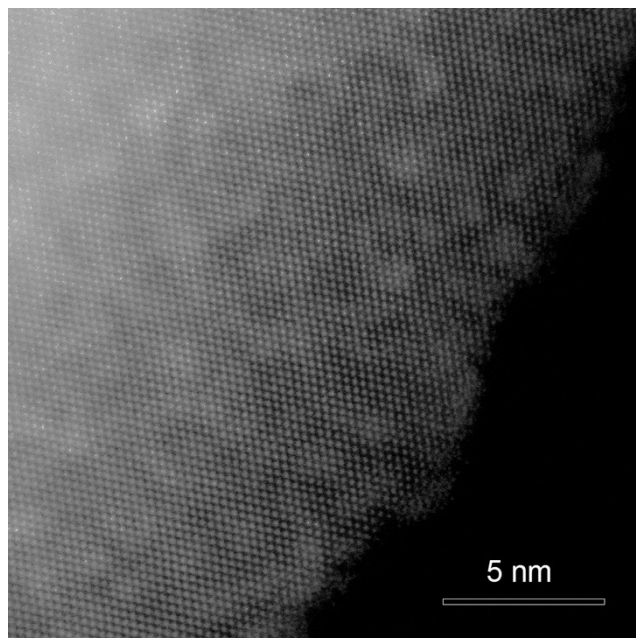

**Figure S6.** The enlarged TEM image of Figure 2C with reduced brightness.

**Table S3.** Details of the crystal structures of Ir and IrO<sub>2</sub> summarized from their PDF cards

|                                  | <b>Crystal</b> | <b>Space group</b> | <b><i>a</i> (Å)</b> | <b><i>c</i> (Å)</b> |
|----------------------------------|----------------|--------------------|---------------------|---------------------|
| Ir (JCPDS 46-1044)               | cubic          | Fm-3m(225)         | 3.840               | -                   |
| IrO <sub>2</sub> (JCPDS 15-0870) | tetragonal     | P42/mnm(136)       | 4.498               | 3.154               |

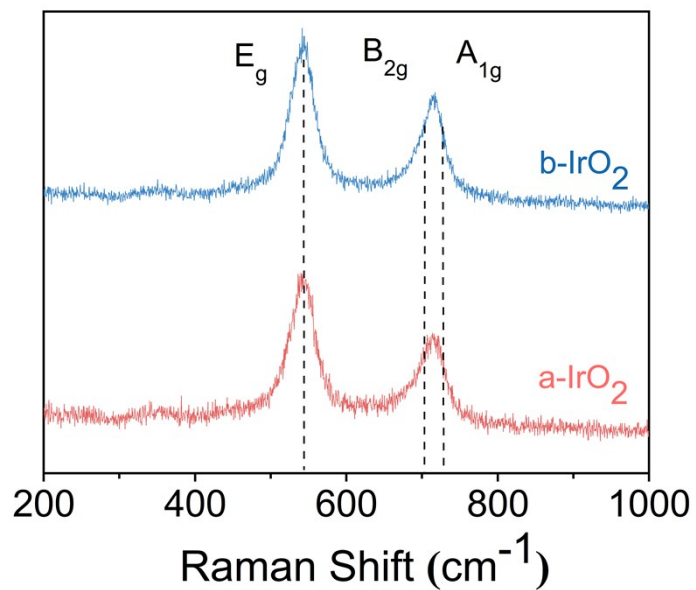

**Figure S7.** Raman spectra of the b-IrO<sub>2</sub> and a-IrO<sub>2</sub>.

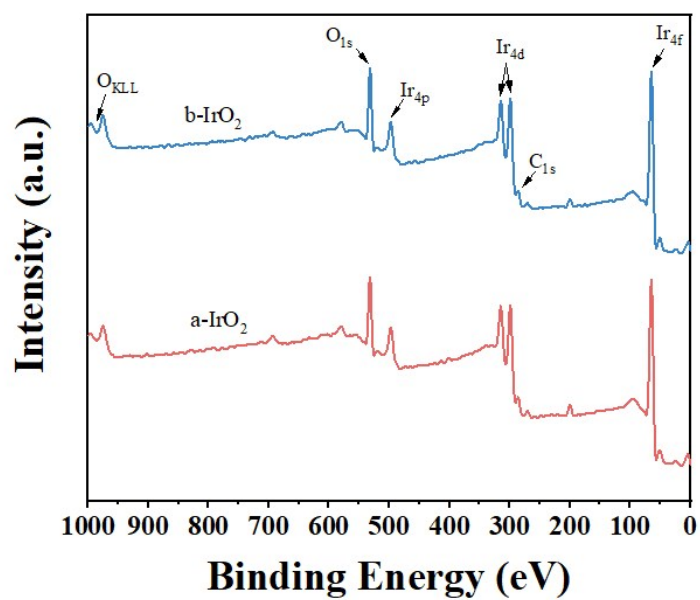

**Figure S8.** XPS survey spectra of the IrO<sub>2</sub> before and after the laser modification.

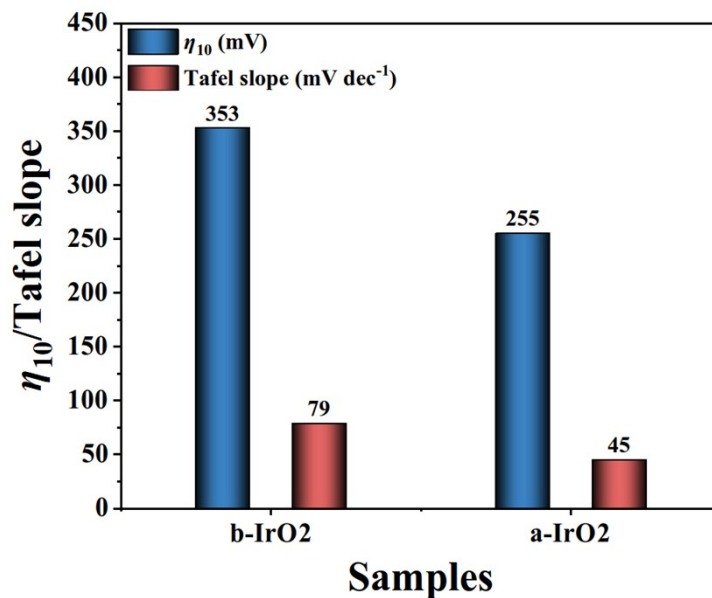

**Figure S9.** Bar chart for the summary of  $\eta_{10}$  values and Tafel slopes for the IrO<sub>2</sub> before and after the laser modification.

**Table S4.** Comparison of the OER performance of the a-IrO<sub>2</sub> and b-IrO<sub>2</sub> samples in alkaline solution with other representative OER catalysts reported in literature.

| Catalyst                                          | Electrolytes | Substrate | $\eta_{10}$ (mV) | Tafel slope (mV dec <sup>-1</sup> ) | Reference                                     |
|---------------------------------------------------|--------------|-----------|------------------|-------------------------------------|-----------------------------------------------|
| RuO <sub>2</sub>                                  | 0.5 M KOH    | FTO       | 358              | 55                                  | <i>ACS Nano</i> , 2015, <b>9</b> , 1977.      |
| IrO <sub>2</sub>                                  | 0.5 M KOH    | FTO       | 411              | 91                                  |                                               |
| CaCu <sub>3</sub> Fe <sub>4</sub> O <sub>12</sub> | 0.1 M KOH    | GCE       | 400              | 51                                  | <i>Nat. Commun.</i> , 2015, <b>6</b> , 8249.  |
| CaFeO <sub>3</sub>                                | 0.1 M KOH    | GCE       | 390              | 47                                  |                                               |
| SrFeO <sub>3</sub>                                | 0.1 M KOH    | GCE       | 410              | 63                                  |                                               |
| LaFeO <sub>3</sub>                                | 0.1 M KOH    | GCE       | 500              | 77                                  | <i>Chem. Mater.</i> , 2016, <b>28</b> , 1691. |
| MnFe <sub>2</sub> O <sub>4</sub>                  | 0.1 M KOH    | GCE       | 470              | 114                                 | <i>Nanoscale</i> , 2015, <b>7</b> , 8920.     |
| CoFe <sub>2</sub> O <sub>4</sub>                  | 0.1 M KOH    | GCE       | 370              | 82                                  |                                               |
| NiFe <sub>2</sub> O <sub>4</sub>                  | 0.1 M KOH    | GCE       | 440              | 98                                  |                                               |
| CuFe <sub>2</sub> O <sub>4</sub>                  | 0.1 M KOH    | GCE       | 410              | 94                                  |                                               |
| Co <sub>3</sub> O <sub>4</sub>                    | 1 M KOH      | Au        | 400              | 49                                  | <i>Chem. Mater.</i> , 2012, <b>24</b> , 3567. |

|                                                      |           |              |            |             |                                                       |
|------------------------------------------------------|-----------|--------------|------------|-------------|-------------------------------------------------------|
| CoO <sub>x</sub> -4h                                 | 1 M KOH   | GCE          | 306        | 65          | <i>Nano Energy</i> , 2018, <b>43</b> , 110.           |
| Au@CoFeO <sub>x</sub>                                | 1 M KOH   | GCE          | 328        | 58          | <i>Nano Lett.</i> , 2017, <b>17</b> , 6040.           |
| CoO hexagrams                                        | 1 M KOH   | GC           | 269        | 64.4        | <i>Chem. Sci.</i> , 2018, <b>9</b> , 6961.            |
| CoCr <sub>2</sub> O <sub>4</sub>                     | 1 M KOH   | GCE          | 422        | 63.3        | <i>Small</i> , 2016, <b>12</b> , 2866.                |
| Fe–Ni nanoparticles                                  | 1 M NaOH  | GCE          | 311        | -           | <i>ACS Catal.</i> , 2016, <b>7</b> , 365.             |
| Thin Ni–Fe hydroxide flm                             | 1 M KOH   | GCE          | 240        | 38.9        | <i>Adv. Energy Mater.</i> , 2017, <b>7</b> , 1770044. |
| Co <sub>0.54</sub> Fe <sub>0.46</sub> OOH            | 0.1 M KOH | GCE          | 390        | 47          | <i>Sci. Rep.</i> , 2017, <b>7</b> , 43590.            |
| Ultrathin Co–Mn LDH                                  | 1 M KOH   | GCE          | 324        | 43          | <i>J. Am. Chem. Soc.</i> , 2014, <b>136</b> , 16481.  |
| Co–Fe LDH (1:0.35)                                   | 0.1 M KOH | GCE          | 350        | 49          | <i>ChemSusChem</i> , 2017, <b>10</b> , 156.           |
| Co–Cr LDH (2:1)                                      | 0.1 M KOH | GCE          | 340        | 81          | <i>J. Mater. Chem. A</i> , 2016, <b>4</b> , 11292.    |
| Exfoliated Ni–Fe nanosheets                          | 1 M KOH   | GCE          | 300        | 40          | <i>Nat. Commun.</i> , 2014, <b>5</b> , 4477.          |
| Ni–Co 3D nanosheets                                  | 1 M NaOH  | FTO          | 340        | 51          | <i>Adv. Energy Mater.</i> , 2015, <b>5</b> , 1500091. |
| Spindle-like ZnCo <sub>2</sub> O <sub>4</sub>        | 1 M KOH   | GCE          | 389        | 60          | <i>RSC Adv.</i> , 2016, <b>6</b> , 92699.             |
| NiFe <sub>2</sub> O <sub>4</sub>                     | 1 M KOH   | Carbon paper | 360        | 40          | <i>ACS Catal.</i> , 2012, <b>2</b> , 1793.            |
| Co <sub>0.5</sub> Mn <sub>0.5</sub> WO <sub>4</sub>  | 0.1 M KOH | GCE          | 400        | 84          | <i>ChemCatChem</i> , 2017, <b>9</b> , 1.              |
| Ni <sub>0.85</sub> Fe <sub>0.15</sub> O              | 0.1 M KOH | GCE          | 328        | 42          | <i>Adv. Sci.</i> , 2015, <b>2</b> , 1500199           |
| LiCo <sub>0.8</sub> Fe <sub>0.2</sub> O <sub>2</sub> | 0.1 M KOH | GCE          | 340        | 50          | <i>Adv. Mater.</i> 2015, <b>27</b> , 7150             |
| LiNi <sub>0.8</sub> Al <sub>0.2</sub> O <sub>2</sub> | 0.1 M KOH | GCE          | 340        | 44          | <i>Adv. Mater.</i> , 2015, <b>27</b> , 6063.          |
| α-Co(OH) <sub>2</sub>                                | 1 M KOH   | GCE          | 380        | 67          | <i>Dalton Trans.</i> , 2017, <b>46</b> , 10545.       |
| γ-CoOOH nanosheet                                    | 1 M KOH   | GCE          | 300        | 38          | <i>Angew. Chem. Int. Ed.</i> , 2015, <b>54</b> , 8722 |
| b-IrO <sub>2</sub>                                   | 1 M KOH   | GCE          | <b>353</b> | <b>79.0</b> | <b>This study</b>                                     |
| a-IrO <sub>2</sub>                                   | 1 M KOH   | GCE          | <b>255</b> | <b>45.0</b> |                                                       |



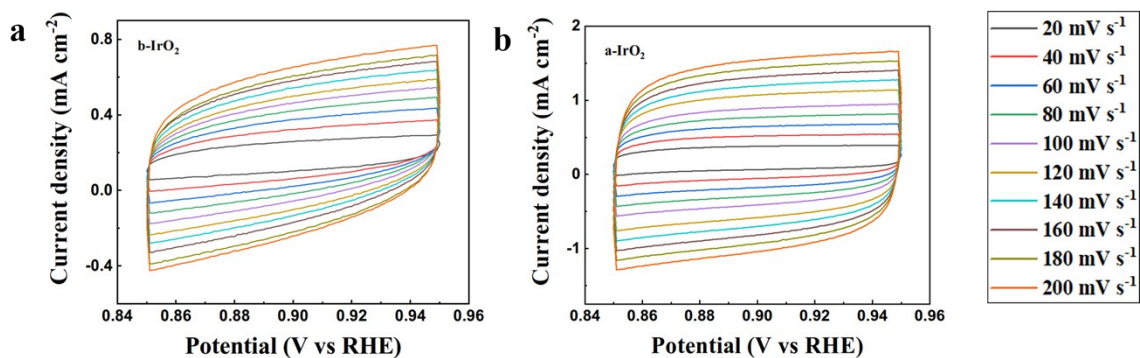

**Figure S10.** Cyclic voltammetry curves recorded in 1 M KOH at scan rates of 20, 40, 60, 80, 100, 120, 140, 160, 180 and 200  $\text{mV s}^{-1}$  for the  $\text{IrO}_2$  before (a) and after (b) the laser modification. The voltage window is 0.85–0.95 V vs. RHE.

Turnover frequency (TOF) is calculated by the equation:  $\text{TOF} = j \cdot A / (4 \cdot F \cdot n)$ , where  $j$  is the electrode current density,  $A$  is the geometric area of the electrode,  $F$  is the Faraday constant of  $96485 \text{ C mol}^{-1}$ ,  $n$  is the molar number of the active metal sites (Ir in this case) that were deposited on the electrode.<sup>S1</sup> The TOF of the a- $\text{IrO}_2$  is calculated to be  $0.026 \text{ s}^{-1}$  per active site at overpotential of 270 mV, whereas the TOF value of the b- $\text{IrO}_2$  is only  $0.0018 \text{ s}^{-1}$  per active site.

Electrochemically active surface area (ECSA): The ECSA of the catalyst can be calculated according to the equation:  $\text{ECSA} = C_{\text{dl}} / C_s$ , where  $C_{\text{dl}}$  is the double layer capacitance of the catalyst,  $C_s$  is the capacitance of the glass carbon electrode ( $C_s = 0.040 \text{ mF cm}^{-2}$ ).<sup>S2</sup> The LSV curves shown in Figure 4A are normalized by the ECSA, and shown in **Figure S11**.

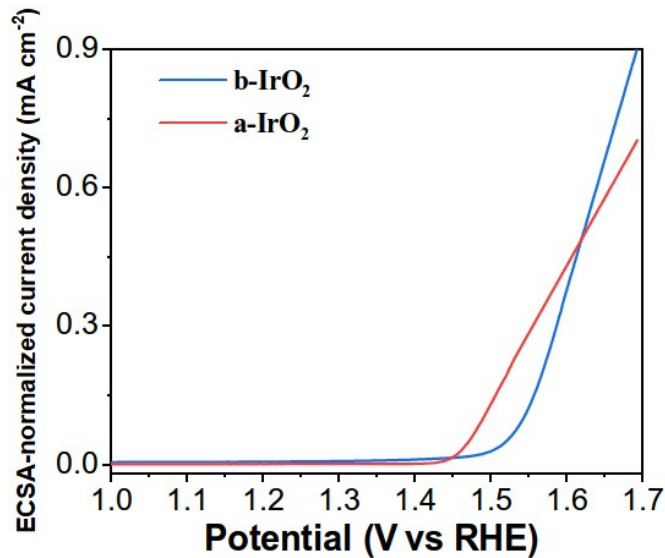

**Figure S11.** The LSV curves normalized by ECSA.

**Table S5.** Summary of the electrochemical data obtained for the IrO<sub>2</sub> before and after the laser modification.

| Sample             | OER Activity              |                                        | $C_{dl}$<br>(mF cm <sup>-2</sup> ) | EIS                |                       |
|--------------------|---------------------------|----------------------------------------|------------------------------------|--------------------|-----------------------|
|                    | $\eta$ @ $j_{10}$<br>(mV) | Tafel Slope<br>(mV dec <sup>-1</sup> ) |                                    | $R_s$ ( $\Omega$ ) | $R_{ct}$ ( $\Omega$ ) |
| b-IrO <sub>2</sub> | 353                       | 79                                     | 2.01                               | 8.72               | 238.80                |
| a-IrO <sub>2</sub> | 255                       | 45                                     | 6.36                               | 12.56              | 70.08                 |

$\eta$ : overpotential;  $j_{10}$ : current density of 10 mA cm<sup>-2</sup>;  $C_{dl}$ : double layer capacitance;  $R_s$  and  $R_{ct}$ : electrolyte resistance and electron transfer resistance in the equivalent circuit.

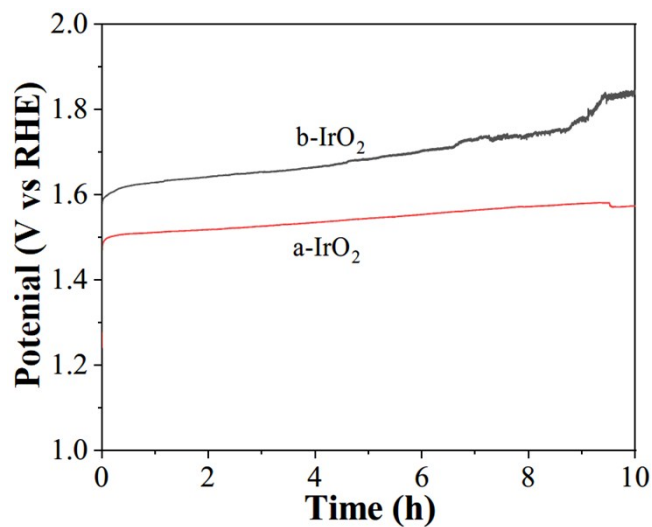

**Figure S12.** Time dependence of the overpotential recorded on the various IrO<sub>2</sub> materials.

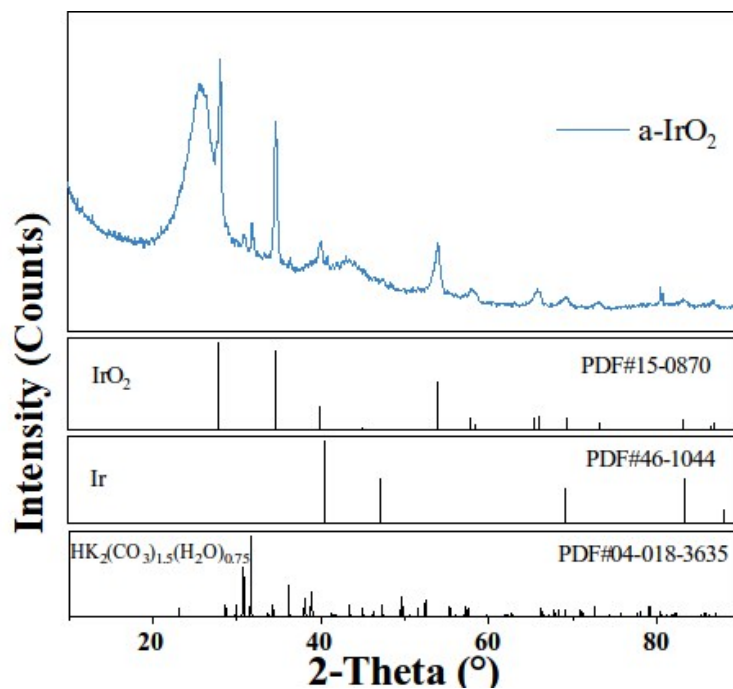

**Figure S13.** XRD patterns of the a-IrO<sub>2</sub> after the stability test. The impurity HK<sub>2</sub>(CO<sub>3</sub>)<sub>1.5</sub>(H<sub>2</sub>O)<sub>0.75</sub> may be generated by the reaction between the carbon cloth substrate and the electrolyte KOH.

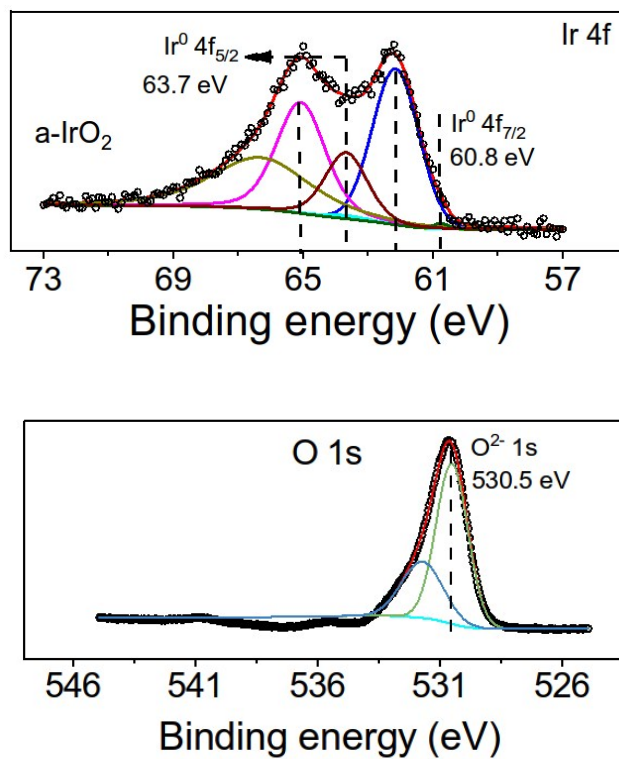

**Figure S14.** XPS spectra of the a-IrO<sub>2</sub> after the stability test.

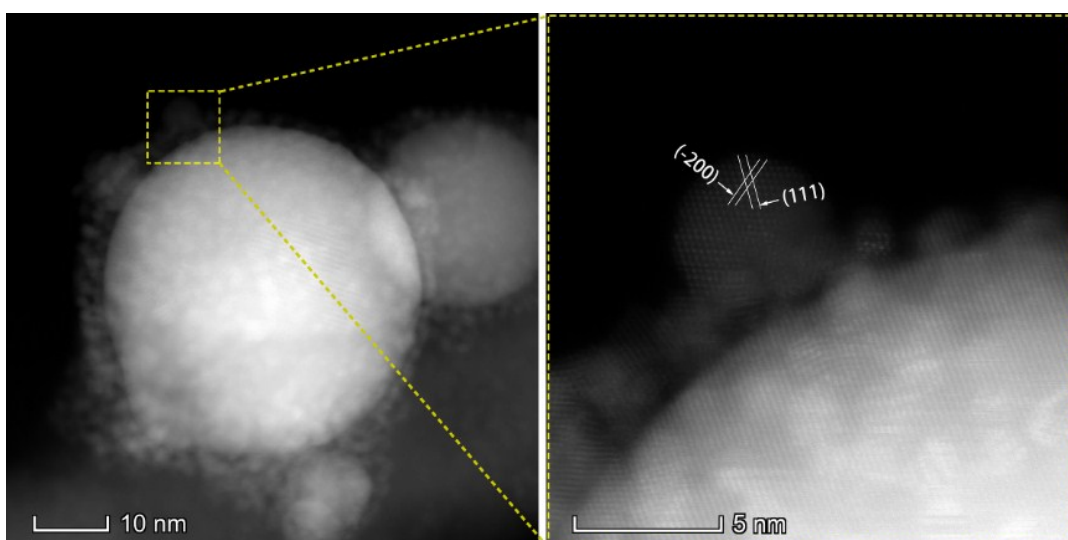

**Figure S15.** HRTEM images of the a-IrO<sub>2</sub> after the stability test.

## References

- S1. M. Gong, Y. Li, H. Wang, Y. Liang, J. Z. Wu, J. Zhou, J. Wang, T. Regier, F. Wei, and H. Dai, An advanced Ni–Fe layered double hydroxide electrocatalyst for water oxidation. *J. Am. Chem. Soc.*, 2013, **135**, 8452-8455.
- S2. C. C. McCrory, S. Jung, I. M. Ferrer, S. M. Chatman, J. C. Peters, and T. F. Jaramillo, Benchmarking hydrogen evolving reaction and oxygen evolving reaction electrocatalysts for solar water splitting devices. *J. Am. Chem. Soc.*, 2015, **137**, 4347-4357.
